# Supplementary material for: Thermally evaporated two-dimensional SnS as an efficient and stable electron collection interlayer for inverted planar perovskite solar cells
Source: Royal Society of Chemistry journal article supplement (doi:10.1039/c8ta10876e), 2019-01-01
Supplement: c8ta10876e1.pdf [file c8ta10876e1.pdf]

## Supplementary Information

# **Thermally Evaporated Two-Dimensional SnS as an Efficient and Stable Electron Collection Interlayer for Inverted Planar Perovskite Solar Cells**

Hikmet Coskun,<sup>a</sup> Furkan H. Isikgor,<sup>a</sup> Zhihui Chen,<sup>b</sup> Muhammad Imran,<sup>a,c</sup> Bichen Li,<sup>a</sup> Qinghua Xu,<sup>b</sup> and Jianyong Ouyang <sup>\*a</sup>

<sup>a</sup> Department of Materials Science & Engineering, National University of Singapore, 7 Engineering Drive 1, 117574, Singapore

<sup>b</sup> Department of Chemistry, National University of Singapore, 3 Science Drive 3, 117543, Singapore

<sup>c</sup> Materials Science Laboratory, Department of Physics, Quaid-i-Azam University, Islamabad, Pakistan

\* Corresponding Author: [mseoj@nus.edu.sg](mailto:mseoj@nus.edu.sg)

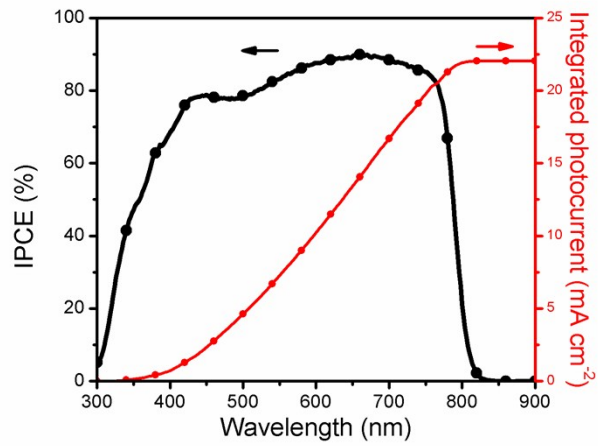

**Figure S1.** Incident photon-to-current conversion efficiency (IPCE) and integrated photocurrent density of ITO/PTAA/perovskite/C<sub>60</sub>/SnS (3nm)/Ag.

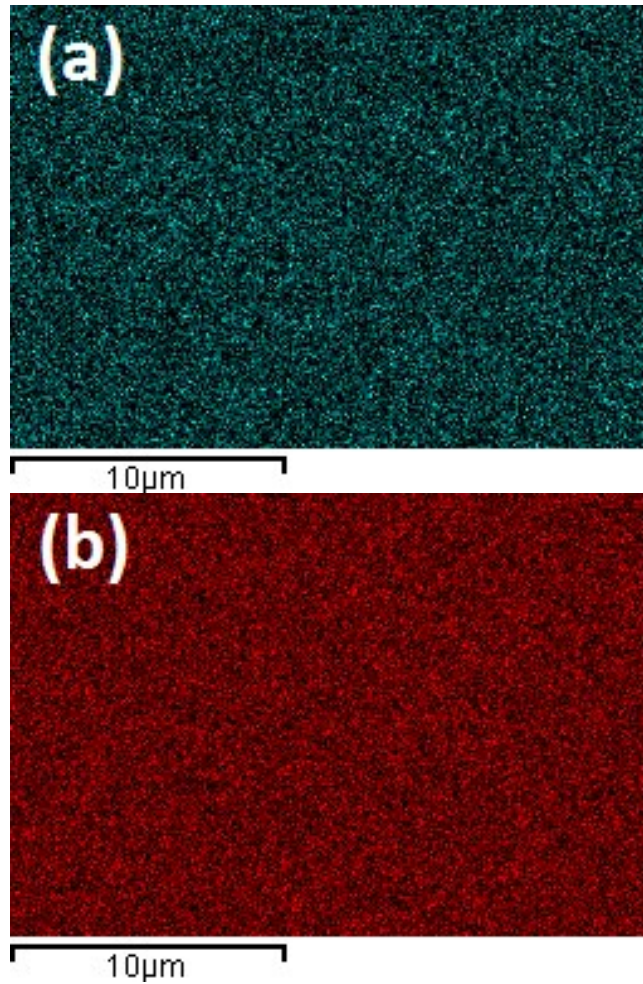

**Figure S2.** SEM mapping for (a) Sn and (b) S of SnS film coated on ITO/PTAA/perovskite/C60.

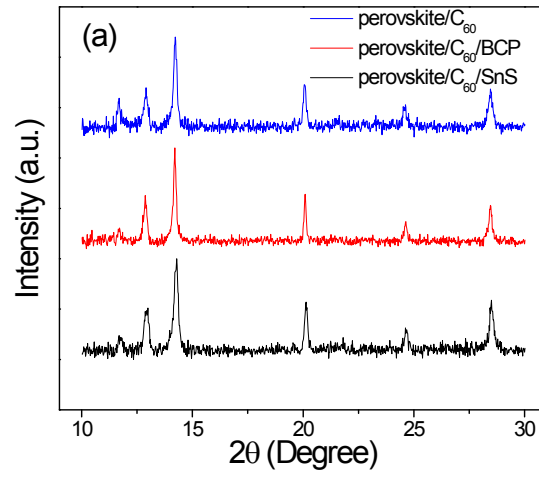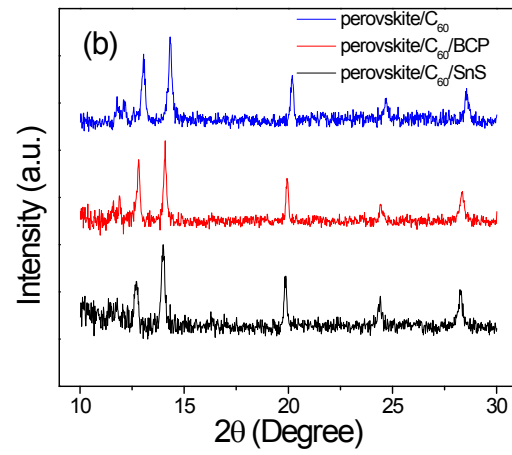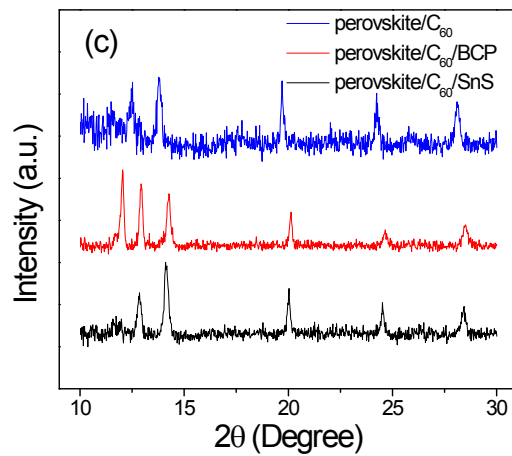

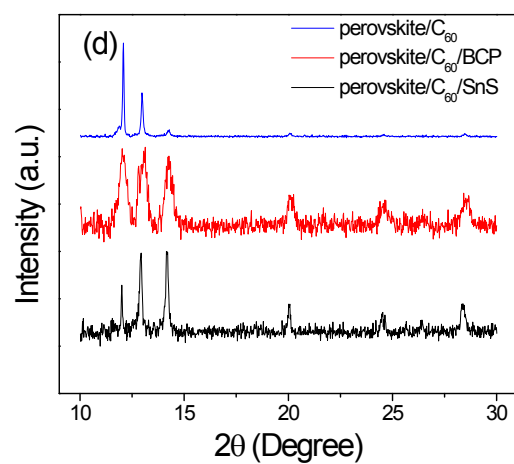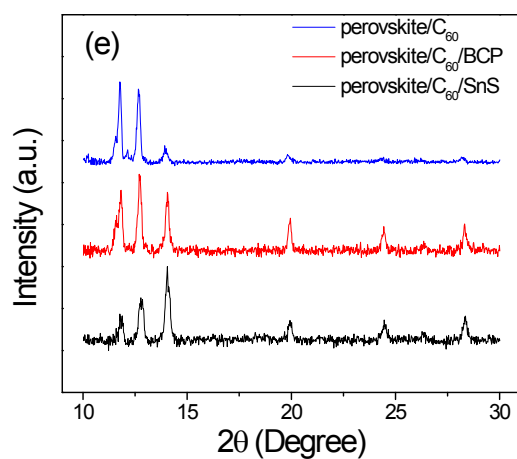

**Figure S3.** X-ray diffraction patterns of 45nm  $C_{60}$ , 45nm  $C_{60}$ /8nm BCP and 45nm  $C_{60}$ /3nm SnS coated perovskite thin films kept in the air at (a) day 0, (b) day 1, (c) day 2, (d) day 5 and (e) day 10.

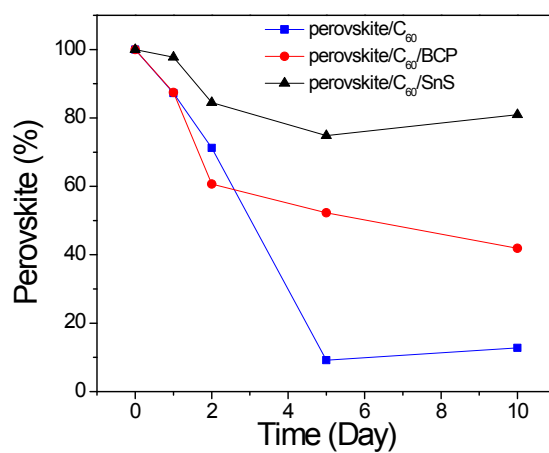

**Figure S4.** Ratio of undegraded perovskite derived from XRD spectra for 45nm C<sub>60</sub>, 45nm C<sub>60</sub>/3nm SnS and 45nm C<sub>60</sub>/8nm BCP coated perovskite thin films, using the formula based on intensities (*I*) on Figure S3,  $Perovskite (\%) = 100 \times \frac{I_{14.2^\circ}}{(I_{14.2^\circ} + I_{12.9^\circ} + I_{10.6^\circ})}$  taking day 0 as a baseline.

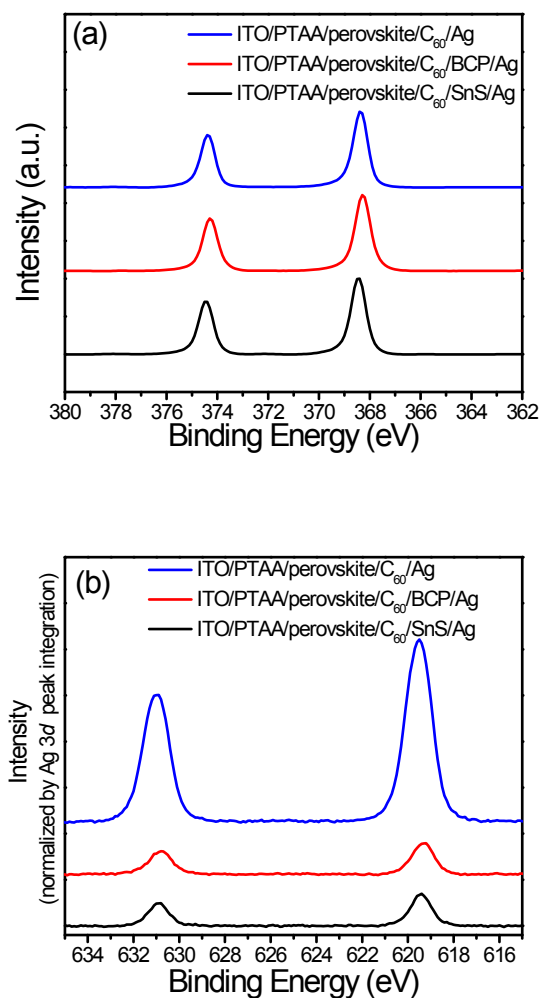

**Figure S5.** (a) Ag 3d region and (b) I 3d region of XPS spectra for ITO/PTAA/perovskite/C<sub>60</sub>/Ag, ITO/PTAA/perovskite/C<sub>60</sub>/BCP(8nm)/Ag and ITO/PTAA/perovskite/C<sub>60</sub>/SnS(3nm)/Ag devices that are aged for 5 days at ambient atmosphere under the light.

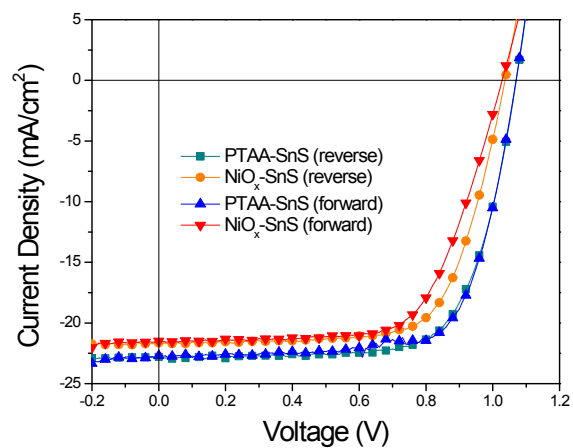

**Figure S6.**  $J$ - $V$  characteristics of PSCs, ITO/NiO<sub>x</sub>/perovskite/C<sub>60</sub>/SnS/Ag and ITO/PTAA/perovskite/C<sub>60</sub>/SnS/Ag under AM1.5G illumination (100 mW cm<sup>-2</sup>) for reverse and forward scan directions.
